# Supplementary material
Source: MDPI journal article supplement (https://www.mdpi.com/2073-4395/13/2/543)
Supplement: s1 [file s1]

## **Supplementary material**

### **Highly Efficient Adsorption Characteristics and Mechanism of Nutshell**

### **Biochars for Aromatic Organophosphorus Insecticides**

Genrong Zhang<sup>a</sup>, Liancheng Fang<sup>a,b</sup>, Zechao Cheng<sup>a</sup>, Taozhong Shi<sup>a</sup>, Xin Ma<sup>a</sup>, Qing X.  
Li<sup>c</sup>, Rimaohua<sup>a,b,\*</sup>

<sup>a</sup> Anhui Provincial Key Laboratory for Quality and Safety of Agri-Products, School of  
Resource & Environment, Anhui Agricultural University, Hefei, Anhui 230036, China

<sup>b</sup> Institute for Green Development, Anhui Agricultural University, Hefei, Anhui  
230036, China

<sup>c</sup> Department of Molecular Biosciences and Bioengineering, University of Hawaii at  
Manoa, 1955 East-West Road, Honolulu, HI 96822, United States

Corresponding author:

Prof. Rimaohua, Fax: +86 551-65786296, E-mail: rimaohua@ahau.edu.cn

**This file includes:**

Table S1. Reported materials for adsorption of organophosphorus pesticides.

Table S2. Thermodynamic fitting parameters.

Figure S1. N<sub>2</sub> adsorption and desorption isothermal curve.

Figure S2. Thermodynamic fitting diagram.

Figure S3. Zeta potential of nutshell biochars before and after adsorption.

Figure S4. Desorption of profenofos on nutshell biochars by acetonitrile.

Figure S5. FTIR of biochars before and after adsorption of profenofos.

**Table S1 Reported materials for adsorption of organophosphorus pesticides.**

| Pesticide    | Adsorption material                                                        | Adsorption<br>equilibrium<br>time (min) | Removal rate<br>of adsorption<br>(%) | Reference |
|--------------|----------------------------------------------------------------------------|-----------------------------------------|--------------------------------------|-----------|
| Profenofos   | Fe/Ni bimetallic<br>nanoparticles                                          | 16                                      | 96                                   | [28]      |
| Profenofos   | magnetic multi-walled<br>carbon nanotubes @<br>organic framework ZIF-<br>8 | 15                                      | 96                                   | [49]      |
| Glyphosate   | rice husk biochar                                                          | 90                                      | 76                                   | [57]      |
| Chlorpyrifos | rGO@ZnO composite                                                          | 70                                      | 95                                   | [58]      |
| Chlorpyrifos | nanoscale Moringa<br>olivera seeds waste                                   | 30                                      | 81                                   | [59]      |
| Acephate     | microwave synthesized<br>zeolitic material                                 | 90                                      | 53                                   | [60]      |

**Table S2 Thermodynamic fitting parameters.**

| Biochar       | Parameters                                          | T (K)  |       |       |
|---------------|-----------------------------------------------------|--------|-------|-------|
|               |                                                     | 298    | 308   | 318   |
| Coconut shell | $\ln K^0$                                           | 2.56   | 2.63  | 2.69  |
|               | $\Delta G^0$ (kJ mol <sup>-1</sup> )                | -6.34  | -6.74 | -7.11 |
|               | $\Delta H^0$ (kJ mol <sup>-1</sup> )                | 4.89   |       |       |
|               | $\Delta S^0$ (J mol <sup>-1</sup> K <sup>-1</sup> ) | 37.7   |       |       |
| Almond shell  | $\ln K^0$                                           | 1.71   | 1.88  | 2.04  |
|               | $\Delta G^0$ (kJ mol <sup>-1</sup> )                | -4.24  | -4.81 | -5.39 |
|               | $\Delta H^0$ (kJ mol <sup>-1</sup> )                | 12.5   |       |       |
|               | $\Delta S^0$ (J mol <sup>-1</sup> K <sup>-1</sup> ) | 56.3   |       |       |
| Walnut shell  | $\ln K^0$                                           | 1.14   | 1.24  | 1.35  |
|               | $\Delta G^0$ (kJ mol <sup>-1</sup> )                | -2.82  | -3.18 | -3.57 |
|               | $\Delta H^0$ (kJ mol <sup>-1</sup> )                | 8.07   |       |       |
|               | $\Delta S^0$ (J mol <sup>-1</sup> K <sup>-1</sup> ) | 36.6   |       |       |
| Rice stalks   | $\ln K^0$                                           | -1.86  | -1.44 | -0.54 |
|               | $\Delta G^0$ (kJ mol <sup>-1</sup> )                | 4.61   | 3.68  | 1.43  |
|               | $\Delta H^0$ (kJ mol <sup>-1</sup> )                | 51.71  |       |       |
|               | $\Delta S^0$ (J mol <sup>-1</sup> K <sup>-1</sup> ) | 157.38 |       |       |
| Rice hulls    | $\ln K^0$                                           | -2.77  | -2.32 | -1.91 |
|               | $\Delta G^0$ (kJ mol <sup>-1</sup> )                | 6.86   | 5.95  | 5.04  |
|               | $\Delta H^0$ (kJ mol <sup>-1</sup> )                | 34.02  |       |       |
|               | $\Delta S^0$ (J mol <sup>-1</sup> K <sup>-1</sup> ) | 91.12  |       |       |
| Bamboo        | $\ln K^0$                                           | -2.98  | -2.56 | -2.21 |

|             |                                                     |        |       |       |
|-------------|-----------------------------------------------------|--------|-------|-------|
| Corn stalks | $\Delta G^0$ (kJ mol <sup>-1</sup> )                | 7.39   | 6.56  | 5.85  |
|             | $\Delta H^0$ (kJ mol <sup>-1</sup> )                | 30.38  |       |       |
|             | $\Delta S^0$ (J mol <sup>-1</sup> K <sup>-1</sup> ) | 77.24  |       |       |
|             | $\ln K^0$                                           | -3.41  | -2.88 | -2.24 |
|             | $\Delta G^0$ (kJ mol <sup>-1</sup> )                | 8.45   | 7.36  | 5.93  |
| Wood        | $\Delta H^0$ (kJ mol <sup>-1</sup> )                | 45.87  |       |       |
|             | $\Delta S^0$ (J mol <sup>-1</sup> K <sup>-1</sup> ) | 125.38 |       |       |
|             | $\ln K^0$                                           | -4.20  | -3.51 | -3.39 |
|             | $\Delta G^0$ (kJ mol <sup>-1</sup> )                | 10.40  | 8.99  | 8.96  |
|             | $\Delta H^0$ (kJ mol <sup>-1</sup> )                | 32.11  |       |       |
|             | $\Delta S^0$ (J mol <sup>-1</sup> K <sup>-1</sup> ) | 73.58  |       |       |

---

Figure S1 N<sub>2</sub> adsorption and desorption isothermal curve.

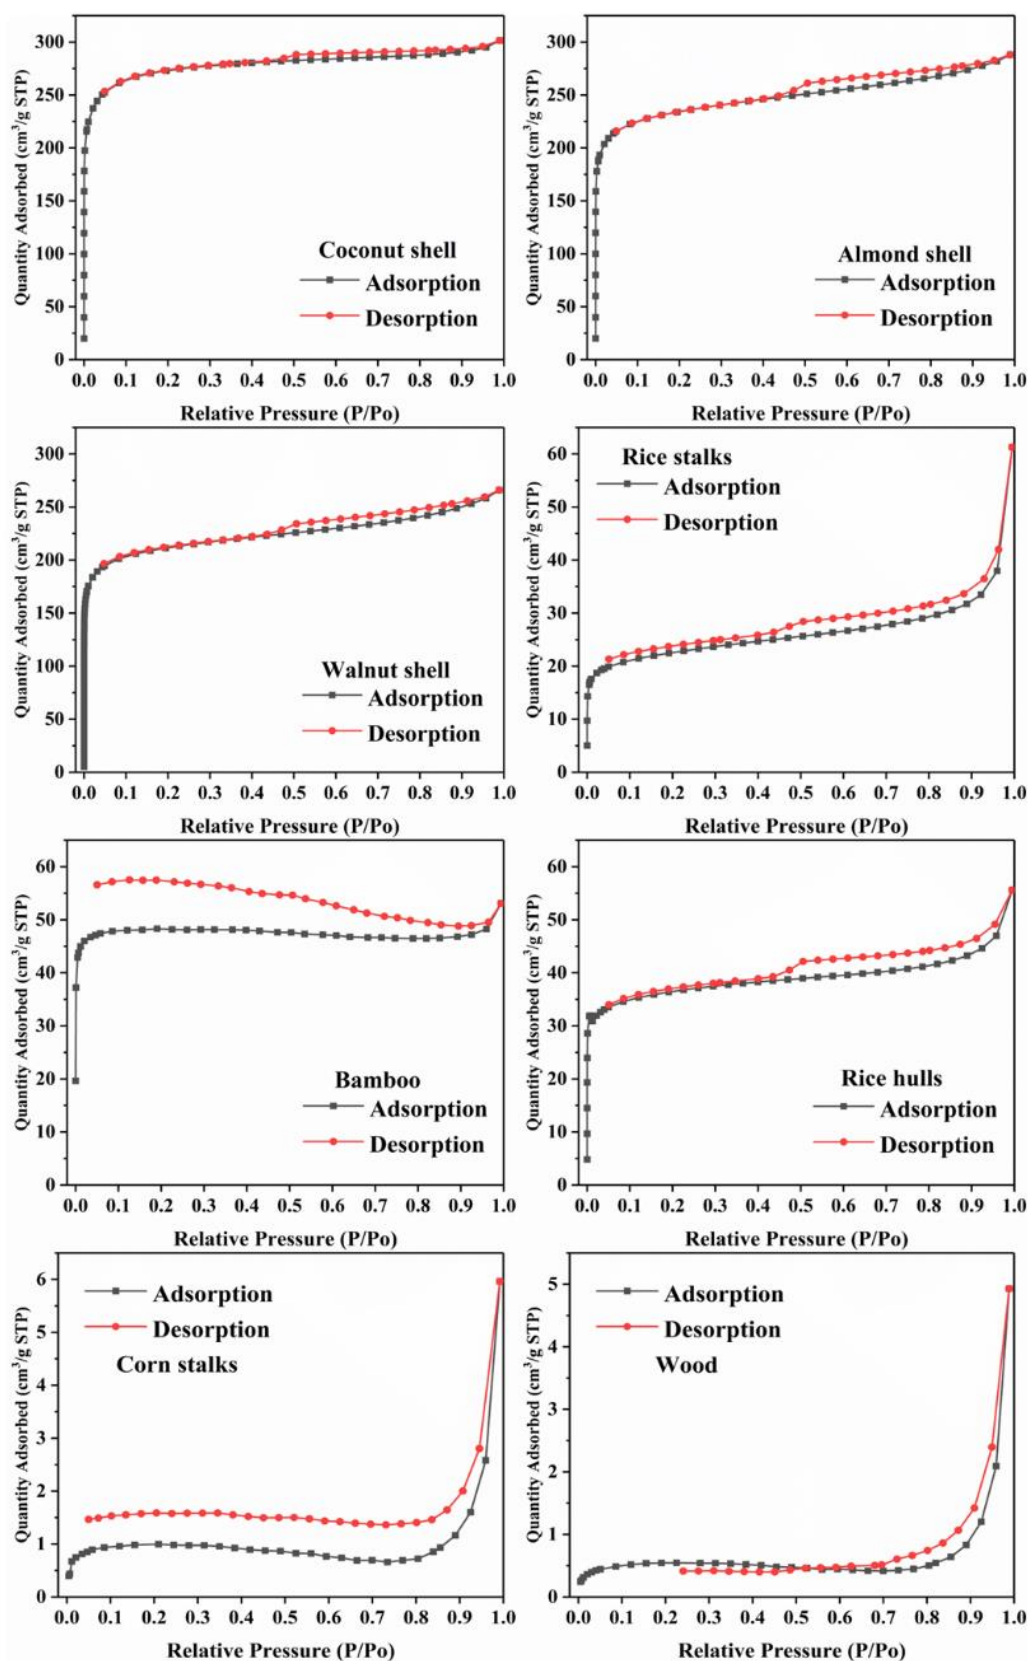

Figure S2 Thermodynamic fitting diagram.

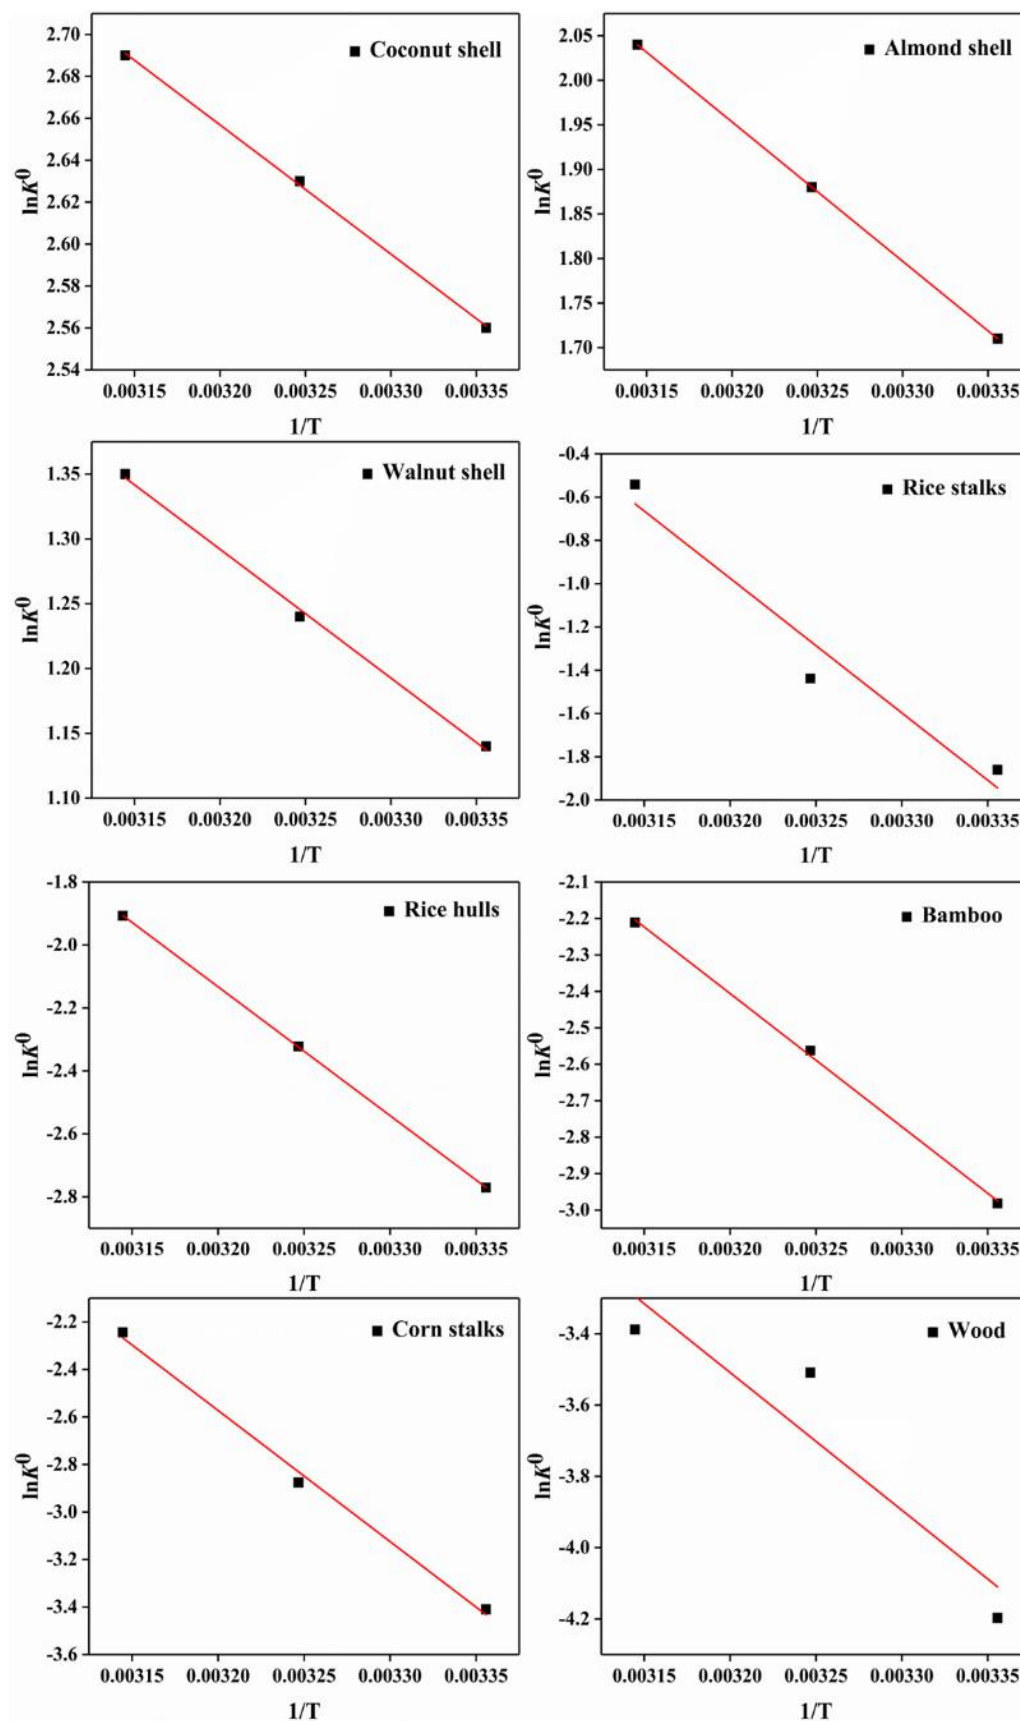

**Figure S3 Zeta potential of nutshell biochars before and after adsorption.**

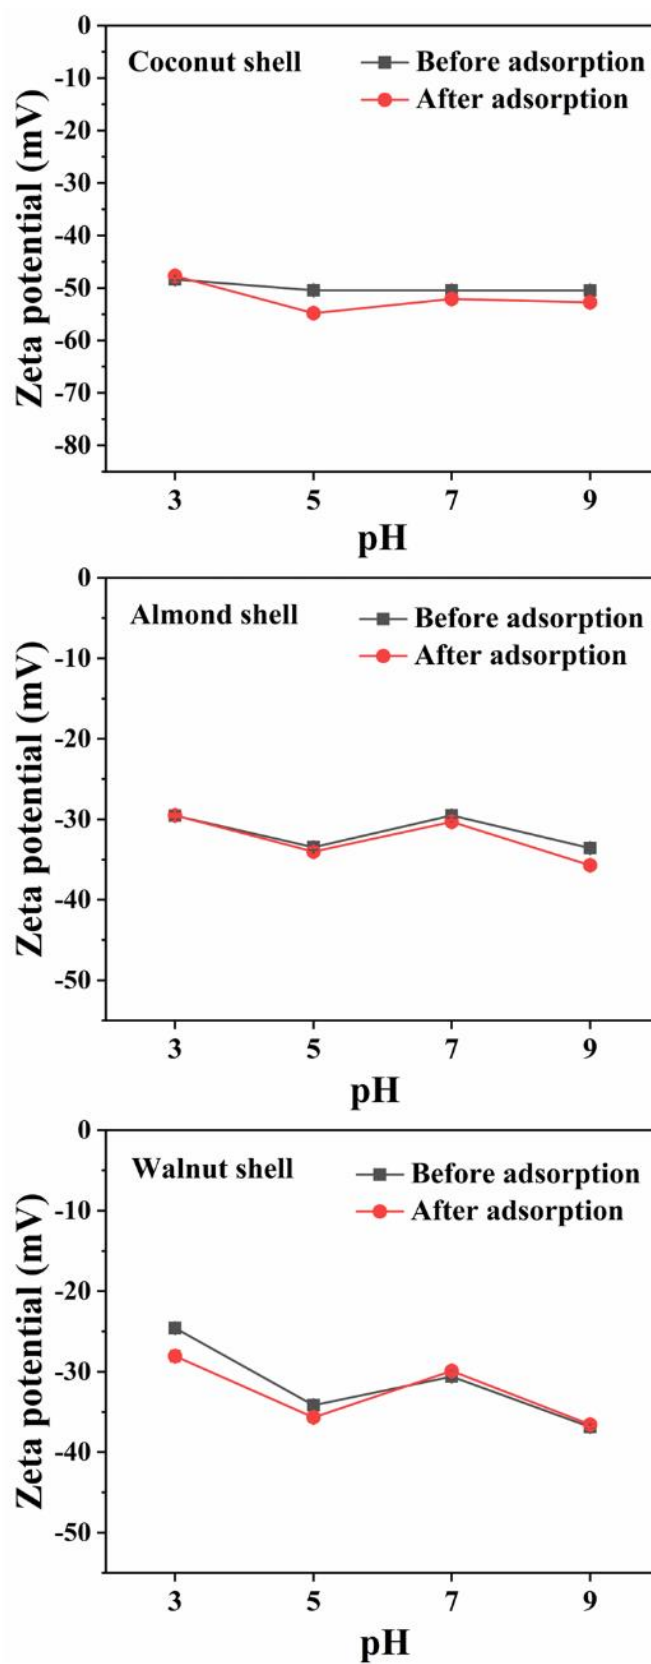



**Figure S4 Desorption of profenofos on nutshell biochars by acetonitrile.**

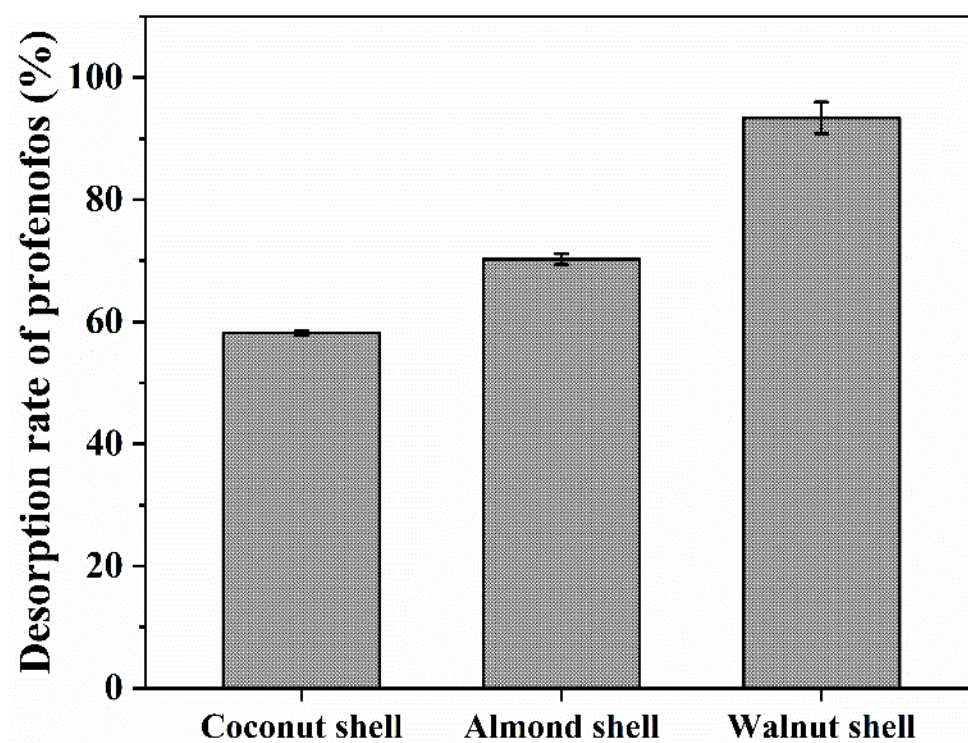

**Figure S5 FTIR of biochars before and after adsorption of profenofos.**

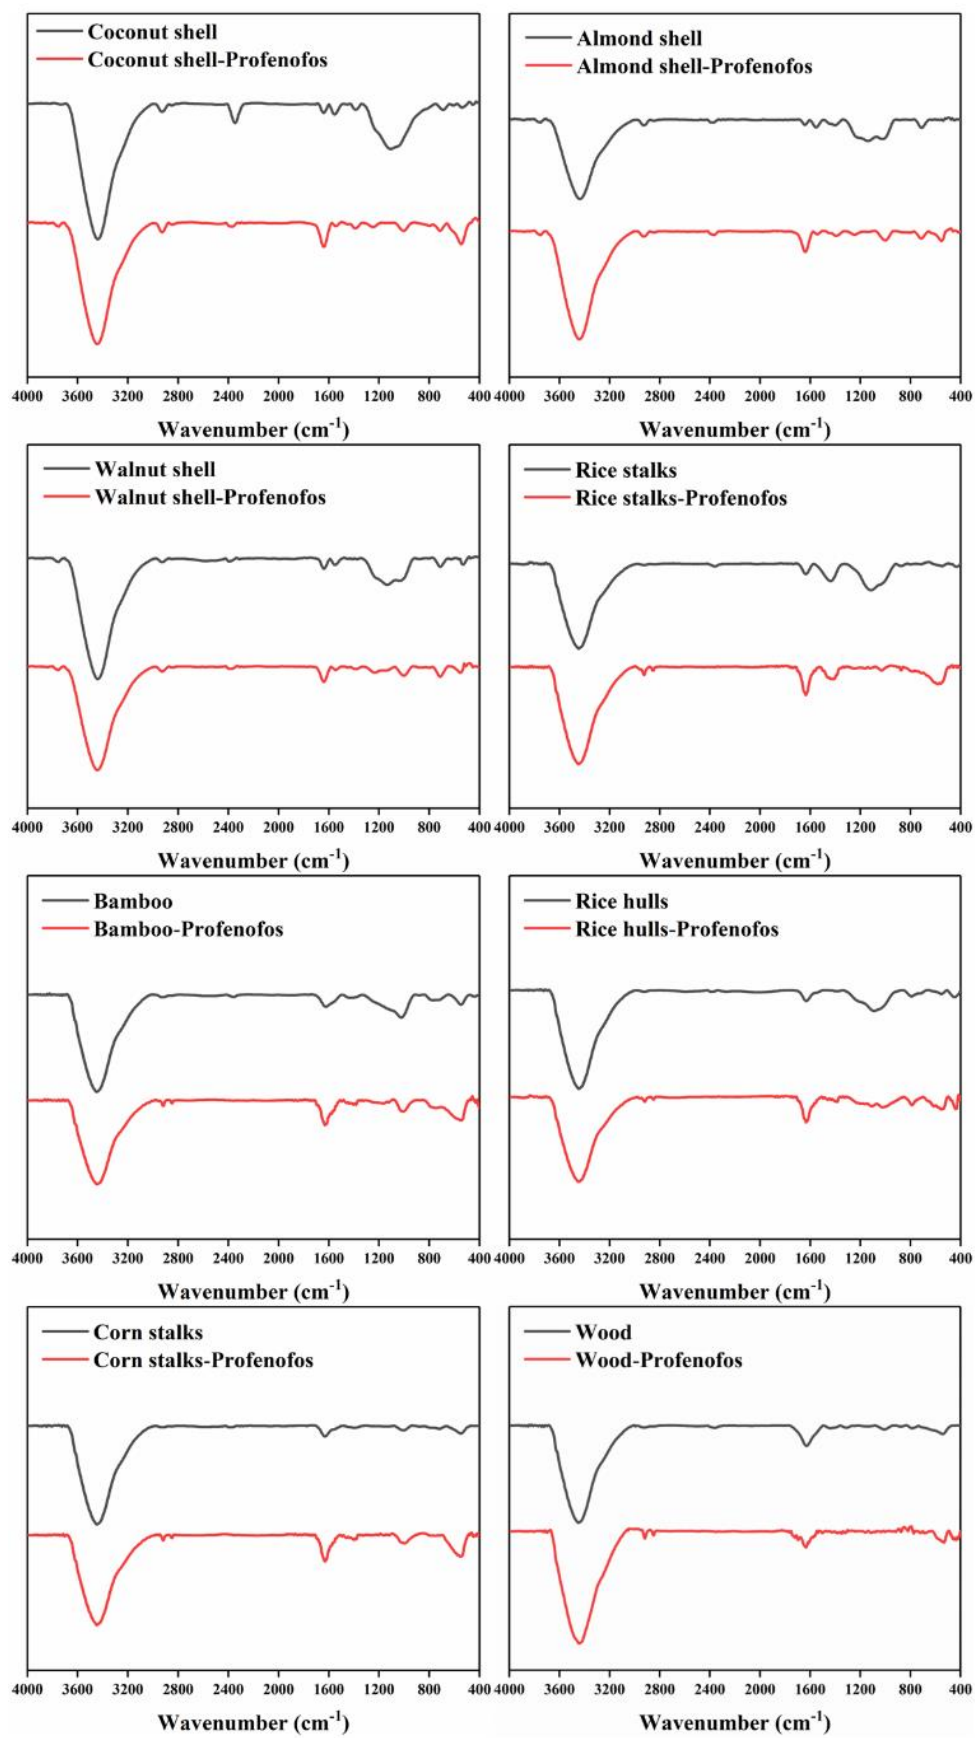

## References

28. Mansouriieh, N.; Sohrabi, M.; Khosravi, M. Adsorption kinetics and thermodynamics of organophosphorus profenofos pesticide onto Fe/Ni bimetallic nanoparticles. *Int. J. Environ. Sci. Technol.* **2016**, *13*, 1393–1404.
49. Liu, G.; Li, L.; Huang, X.; Zheng, S.; Xu, X.; Liu, Z.; Zhang, Y.; Wang, J.; Lin, H.; Xu, D. Adsorption and removal of organophosphorus pesticides from environmental water and soil samples by using magnetic multi-walled carbon nanotubes@ organic framework ZIF-8. *J. Mater. Sci.* **2018**, *53*, 10772–10783.
57. Herath, I.; Kumarathilaka, P.; Al-Wabel, M.I.; Abduljabbar, A.; Ahmad, M.; Usman, A.R.; Vithanage, M. Mechanistic modeling of glyphosate interaction with rice husk derived engineered biochar. *Micropor. Mesopor. Mat.* **2016**, *225*, 280–288.
58. Gulati, A.; Malik, J.; Kakkar, R. Mesoporous rGO@ ZnO composite: Facile synthesis and excellent water treatment performance by pesticide adsorption and catalytic oxidative dye degradation. *Chem. Eng. Res. Des.* **2020**, *160*, 254–263.
59. Hamadeen, H.M.; Elkhatib, E.A.; Badawy, M.E.; Abdelgaleil, S.A. Green low cost nanomaterial produced from Moringa oleifera seed waste for enhanced removal of chlorpyrifos from wastewater: Mechanism and sorption studies. *J. Environ. Chem. Eng.* **2021**, *9*(4), 105376.
60. Shah, B.A.; Shah, A.V.; Jadav, P.Y. Extractive efficacy of microwave synthesized zeolitic material for acephate: Equilibrium and kinetics. *J. Serb. Chem. Soc.* **2013**, *78*(7), 1055–1077.
